# Supplementary material for: Enhancing the prediction of vitamin D deficiency levels using an integrated approach of deep learning and evolutionary computing
Source: PeerJ journal article supplement (doi:10.7717/peerj-cs.2698), 2025-02-21
Supplement: Questionnaire.pdf [file Questionnaire.pdf]

# Vitamin D Deficiency Risk Assessment Questionnaire

## Participant Information

- **Patient ID:** \_\_\_\_\_
  - **Age (years):** \_\_\_\_\_
  - **Sex:**
    - ☐ Male
    - ☐ Female
- 

## Demographic Information

1. **Race/Ethnicity:**
    - ☐ African American
    - ☐ Asian
    - ☐ Hispanic
    - ☐ Caucasian
    - ☐ Other: \_\_\_\_\_
  2. **Residential Area:**
    - ☐ Urban
    - ☐ Suburban
    - ☐ Rural
  3. **Current Season (When completing this survey):**
    - ☐ Spring
    - ☐ Summer
    - ☐ Fall
    - ☐ Winter
- 

## Health and Lifestyle Information

### 4. Body Mass Index (BMI):

*Height (in cm):* \_\_\_\_\_

*Weight (in kg):* \_\_\_\_\_

**Calculated BMI:** \_\_\_\_\_

### 5. Do you have any of the following medical conditions?

- ☐ Osteoporosis
- ☐ Diabetes
- ☐ Hypertension

- ☐ Cardiovascular disease
- ☐ None
- ☐ Other: \_\_\_\_\_

**6. Are you currently taking any medications? (Select all that apply)**

- ☐ Anticonvulsants
- ☐ Steroids
- ☐ Diuretics
- ☐ Vitamin D supplements
- ☐ None
- ☐ Other: \_\_\_\_\_

**7. Lifestyle Choices:**

- Do you smoke?
  - ☐ Yes
  - ☐ No
- Do you consume alcohol?
  - ☐ Yes
  - ☐ No
- Do you engage in regular physical activity?
  - ☐ Yes
  - ☐ No

**Dietary Intake**

**8. Average daily intake of calcium (in mg):**

*Please estimate your average calcium intake based on dairy products, supplements, and other sources.*

- ☐ Less than 500 mg
- ☐ 500-1000 mg
- ☐ 1000-1500 mg
- ☐ More than 1500 mg

**9. Average daily intake of Vitamin D (in IU):**

*Please estimate your daily Vitamin D intake from food, supplements, and fortified products.*

- ☐ Less than 200 IU
- ☐ 200-400 IU
- ☐ 400-800 IU
- ☐ More than 800 IU

---

### Sun Exposure

#### 10. Average weekly sun exposure:

*How many hours per week do you spend outdoors with direct sun exposure?*

- ☐ Less than 1 hour
- ☐ 1-3 hours
- ☐ 3-6 hours
- ☐ More than 6 hours

#### 11. In which parts of the day do you usually get sun exposure?

- o ☐ Morning (before 10 AM)
- o ☐ Midday (10 AM to 3 PM)
- o ☐ Afternoon (after 3 PM)

#### 12. Do you use sunscreen regularly when outdoors?

- o ☐ Yes
- o ☐ No

---

### Vitamin D Levels and Diagnosis

#### 13. Most recent Vitamin D test result (if available):

- *Vitamin D level (in ng/mL):* \_\_\_\_\_

#### - Deficiency Level (if diagnosed by a physician):

- ☐ Deficient
- ☐ Insufficient
- ☐ Sufficient
- ☐ Unsure

---

### General Health Information

#### 14. In the past year, how often have you experienced fatigue or muscle pain?

- ☐ Rarely
- ☐ Occasionally
- ☐ Frequently
- ☐ Constantly

#### 15. Do you have a history of bone fractures or low bone density?

- o ☐ Yes
  - o ☐ No
-

**Additional Information**

**16. Any other relevant health information or conditions not mentioned above?**

*Please specify:* \_\_\_\_\_

---

This detailed questionnaire gathers comprehensive information about a participant's demographics, lifestyle, health, and dietary habits, providing a strong foundation for the prediction of Vitamin D deficiency. Let me know if you'd like any adjustments or additional sections!
